# Supplementary material for: Trends and Associated Factors of Under-five Mortality Based on 2008–2016 Data in Kersa Health and Demographic Surveillance Site, Eastern Ethiopia
Source: PubMed Central journal article supplement — Inquiry. 2022 Apr 5;59:00469580221090394. doi: 10.1177/00469580221090394 (PMC8988672; doi:10.1177/00469580221090394), 2022-04-05
Supplement: sj-pdf-1-inq-10.1177_00469580221090394.pdf [file sj-pdf-1-inq-10.1177_00469580221090394.pdf]

## Supplementary File

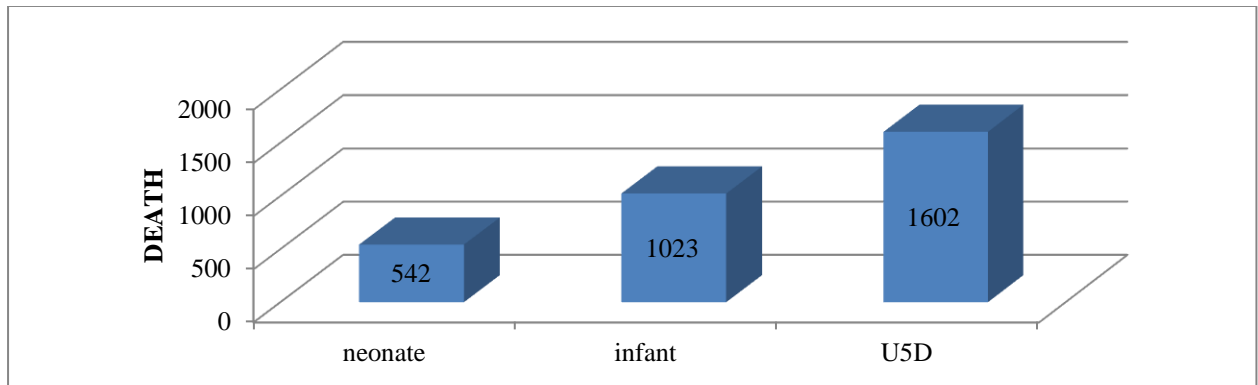

**Figure 1: Overall under-five children mortality in Kersa health and demographic surveillance site: 2008-2016 data analysis, Ethiopia, 2020.**

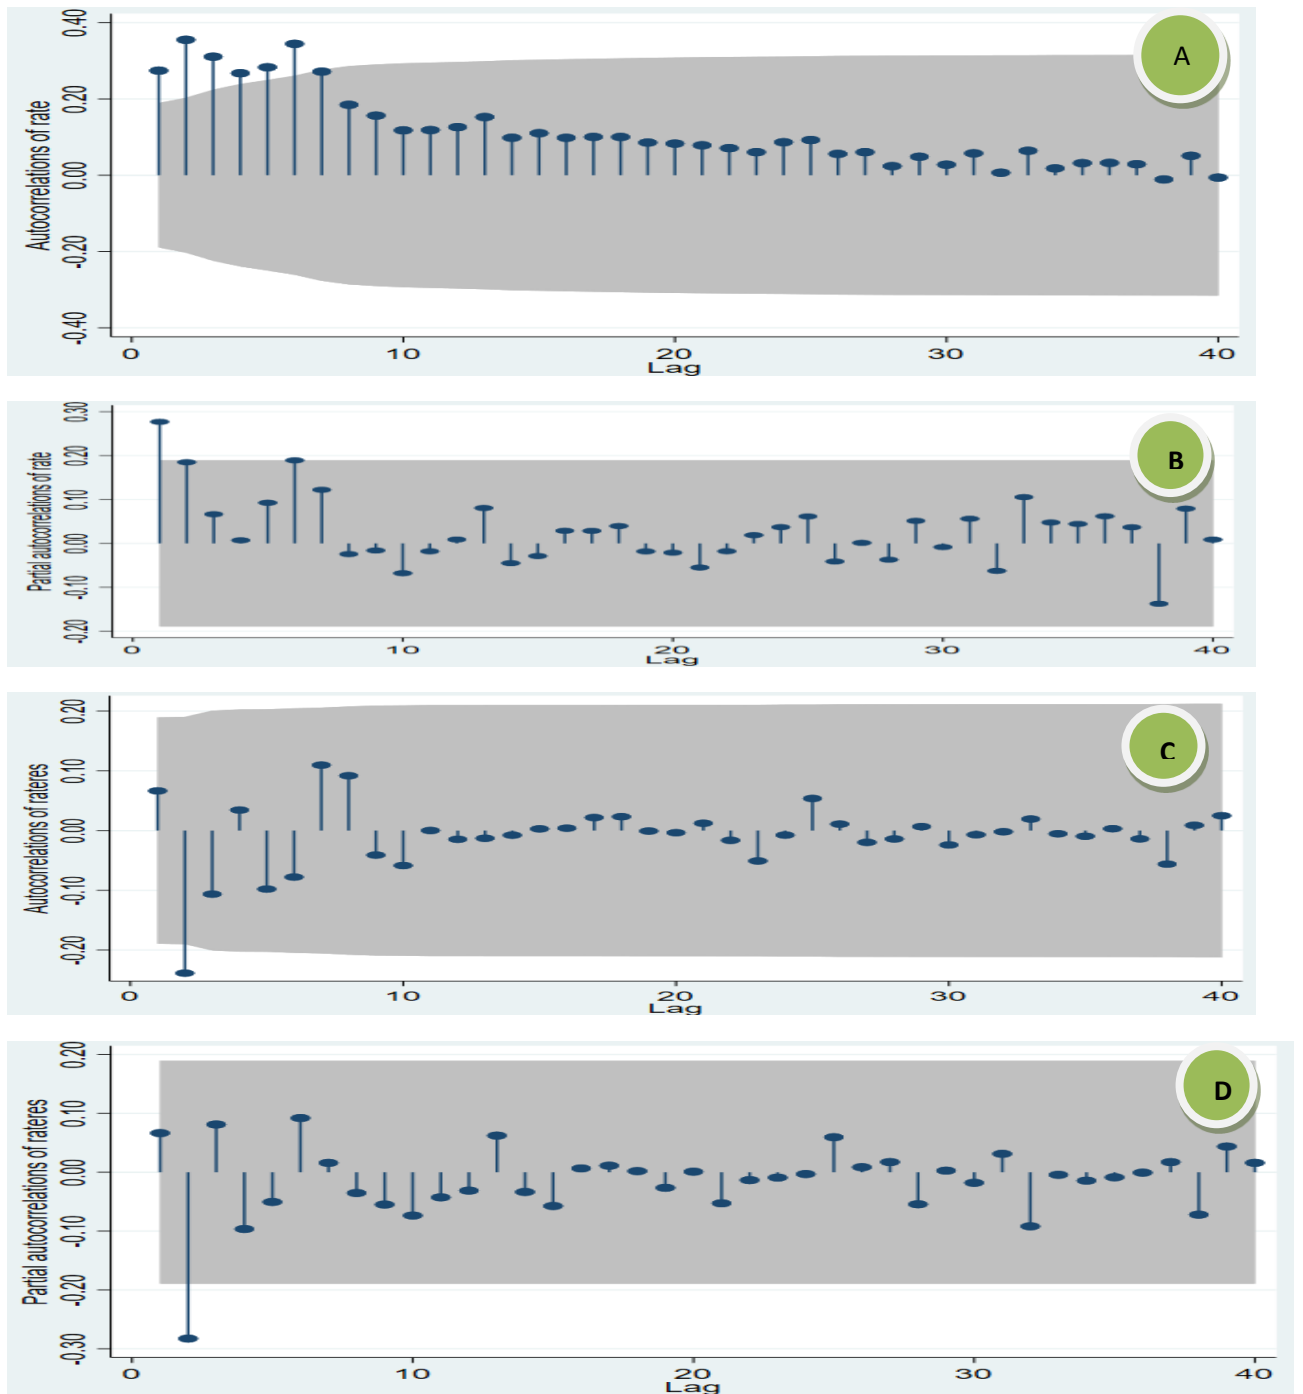

**Figure 2:** ACF (A, C) and PACF (B, D) plots of U5MR series (A, B), the residual of fitted ARIMA (1,0,4) model (C, D), respectively to predict under five mortality rates in Kersa health and demographic surveillance site, Ethiopia, 2020.
